# Supplementary material
Source: publisher figshare collection journal article supplement (https://gsajournals.figshare.com/ndownloader/files/16411763)
Supplement: Supplementary file 1 [file 16411763]

## Sheet: ult1_clf-2
Table S6. Genes oppositely regulated by ULT1 and CLF in inflorescence apices, p<0.05
Array element
257008_at
262637_at
263161_at
264987_at
254377_at
257641_s_at
253697_at
262232_at
256977_at
259842_at
263031_at
261150_at
250344_at
256008_s_at
264166_at
261913_at
264341_at
257815_at
250558_at
264830_at
264953_at
263034_at
255773_at
251012_at
253800_at
264899_at
248619_at
265058_s_at
258321_at
262939_s_at
257102_at
264873_at
253475_at
256299_at
259640_at
245465_at
248625_at
257517_at
250633_at
263662_at
246494_at
264066_at
253818_at
266326_at
265430_at
254185_at
265185_at
266353_at
259165_at
256489_at
252863_at
263706_s_at
266549_at
259833_at
254389_s_at
252357_at
250251_at
259518_at
261059_at
255438_at
263544_at
262181_at
260190_at
263714_at
249012_at
255471_at
263452_at
246511_at
256976_at
266352_at
254687_at
260946_at
254041_at
259516_at
249797_at
253090_at
263120_at
263433_at
267112_at
265053_at
260385_at
245254_at
250815_s_at
252983_at
246310_at
250533_at
258040_at
250794_at
253050_at
248353_at
262891_at
251827_at
247191_at
267055_at
263477_at
260392_at
252123_at
254789_at
261907_at
253627_at
255604_at
251106_at
255230_at
265649_at
255104_at
251287_at
257264_at
253957_at
260396_at
251196_at
264774_at
252367_at
245506_at
265511_at
262399_at
262229_at
261782_at
247092_at
258323_at
264513_at
262947_at
262986_at
253161_at
253305_at
247543_at
264102_at
263963_at
253814_at
245392_at
257823_at
256914_at
262940_at
265817_at
253125_at
263231_at
247754_at
252250_at
245505_at
249606_at
250287_at
261558_at
252972_at
267461_at
254016_at
257615_at
263184_at
256603_at
256894_at
249996_at
259977_at
250099_at
262374_s_at
256324_at
265175_at
266656_at
264339_at
265983_at
248050_at
246917_at
251039_at
258327_at
254955_at
259751_at
257966_at
251342_at
253281_at
266583_at
264507_at
262160_at
253806_at
251443_at
265387_at
246251_at
246596_at
264788_at
247540_at
254954_at
258939_at
266072_at
249241_at
260362_at
254919_at
256096_at
249923_at
249234_at
253279_at
251403_at
264280_at
264779_at
249742_at
260073_at
261265_at
260381_at
257868_at
256542_at
247282_at
259979_at
255255_at
259015_at
259500_at
253973_at
245906_at
245668_at
260101_at
265478_at
254787_at
259244_at
248460_at
252950_at
262092_at
262174_at
246028_at
259694_at
262505_at
267138_s_at
259017_at
250941_at
263674_at
253908_at
248975_at
262656_at
257745_at
254688_at
260431_at
263647_at
258225_at
261629_at
246396_at
256772_at
251784_at
255380_at
247921_at
259080_at
246506_at
266299_at
263737_at
258402_at
251996_at
264435_at
248901_at
259310_s_at
253517_at
260302_at
255764_at
254001_at
249694_at
252927_at
248491_at
261133_at
264246_at
255602_at
266265_at
259618_at
